# Supplementary material
Source: PubMed Central journal article supplement (PMC6441384)
Supplement: NIHMS1014045-supplement-Suppl_Tables.pdf [file NIHMS1014045-supplement-Suppl_Tables.pdf]

**Supplementary Table 1: Summary statistics of the obesity and glycemc traits analyzed**

| Outcome Trait                                            | PubMed ID | Phenotype transformation | Units of effect size    | Description                                                                                                                          |
|----------------------------------------------------------|-----------|--------------------------|-------------------------|--------------------------------------------------------------------------------------------------------------------------------------|
| Body mass index (BMI)                                    | 25673413  | quantile transformation  | standard deviations     | Body mass index                                                                                                                      |
| Waist-Hip ratio adj. BMI                                 | 25673412  | quantile transformation  | standard deviations     | Waist-hip ratio, adjusted for BMI                                                                                                    |
| Fasting glucose                                          | 22581228  | none                     | log(mmol/L)             | Fasting glucose                                                                                                                      |
| Fasting insulin (adj. BMI)                               | 22581228  | log                      | log(pmol/L)             | Fasting insulin adjusted for BMI                                                                                                     |
| Fasting proinsulin                                       | 21873549  | log                      | log(pmol/L)             | Fasting pro-insulin                                                                                                                  |
| HOMA-IR                                                  | 20081858  | log                      | log( (mU/L)*(mmol/L) )  | HOMA IR                                                                                                                              |
| HOMA-B                                                   | 20081858  | log                      | log ( (mU/L)/(mmol/L) ) | HOMA B                                                                                                                               |
| HbA1c                                                    | 20858683  | none                     | %                       | Glycated hemoglobin                                                                                                                  |
| Insulin secretion (IS) - Insulin sensitivity Index (ISI) | 24699409  | none                     | mg/dL                   | Insulin Sensitivity Index: 10,000/sqrt(fasting plasma glucose (mg/dl) x fasting insulin x mean glucose during OGTT)                  |
| IS AUC <sub>insulin</sub> /AUC <sub>glucose</sub>        | 24699409  | none                     | mU/mmol                 | ratio of the area under the curve (AUC) for AUC <sub>insulin</sub> /AUC <sub>glucose</sub> after OGTT                                |
| IS Increase at 30 minutes                                | 24699409  | none                     | mU/L                    | Insulin increase at 30 min: insulin at 30 min (during OGTT) – fasting insulin                                                        |
| IS AUC <sub>insulin</sub>                                | 24699409  | none                     | mU×min/L                | area under the curve (AUC) of insulin levels during OGTT                                                                             |
| IS Correct Insulin Response (adj. ISI)                   | 24699409  | none                     | original                | Correct Insulin Response: (100 x insulin at 30 min)/(glucose at 30 min*(glucose at 30 min–3.89)), adjusted for Insulin secretion ISI |
| IS Disposition Index (DI)                                | 24699409  | none                     | original                | Disposition index: CIR x ISI                                                                                                         |
| IS Insulin at 30 minutes (adj. BMI)                      | 24699409  | none                     | original                | Insulin at 30 min/ (glucose at 30 min x BMI)                                                                                         |
| 2hr Glucose (adj. BMI)                                   | 20081857  | none                     | mmol/L                  | Glucose after 2 hours of OGTT, adjusted for BMI                                                                                      |
| Type 2 diabetes                                          | 28566273  | none                     | Odds Ratio              | Type 2 Diabetes                                                                                                                      |

**Supplementary Table 2: Microbiome features that correlate with obesity and glycemic traits at FDR<0.1.**

The table lists microbiome features that correlate with obesity and glycemic traits in the LL-DEEP cohort at FDR <0.1. The number of individuals used for each microbiome feature-trait pair is given in column N. Spearman correlation value and corresponding two-sided pvalue were calculated in R using the *cor.test()* function; pvalues were subsequently adjusted for multiple-testing using the *p.adjust()* function.

*(Included as a separate excel file)*

**Supplementary Table 3: Short chain fatty acid levels that correlate with obesity and glycemic traits at FDR <0.1**

The table lists fecal short chain fatty acid levels that correlate with obesity and glycemic traits in the LL-DEEP cohort at FDR <0.1. The number of individuals used for each microbiome feature-trait pair is given in column N. Spearman correlation value and corresponding two-sided pvalue were calculated in R using the *cor.test()* function; pvalues were subsequently adjusted for multiple-testing using the *p.adjust()* function in R.

| <b>Trait</b>          | <b>Short chain fatty acid</b> | <b>Spearman Correlation</b> | <b>P</b> | <b>N</b> | <b>FDR P</b> |
|-----------------------|-------------------------------|-----------------------------|----------|----------|--------------|
| Body mass index (BMI) | Propionate                    | 0.10                        | 3.24E-03 | 934      | 9.87E-02     |
| BMI                   | Butyrate                      | 0.10                        | 2.75E-03 | 935      | 9.87E-02     |
| Waist-Hip ratio (WHR) | Propionate                    | 0.09                        | 4.23E-03 | 934      | 9.87E-02     |

**Supplementary Table 4: Genetic predictors of PWY-5022 and their association coefficients estimated by GWAS analysis**

The table lists the genetic predictors of PWY-5022 and their association coefficient derived from the genome-wide association analysis in 952 normo-glycemic Lifelines individuals. For each genetic predictor, both HGVS and dbSNP identifiers are given. The (two-sided) pvalue was calculated using the linear mixed model implemented in EPACTS (Kang, H.M. et al. Nat Genet 42, 348-54 (2010)) as described in the Methods section.

| <b>HGVS</b>                 | <b>dbSNP</b> | <b>Effect Allele (EA)</b> | <b>EA Frequency</b> | <b>Beta (95%CI)</b> | <b>P</b> |
|-----------------------------|--------------|---------------------------|---------------------|---------------------|----------|
| NC_000010.10:g.5608741A>T   | rs9423658    | C                         | 0.86                | 0.33 (0.19,0.48)    | 5.7E-06  |
| NC_000011.9:g.34314176T>C   | rs881390     | C                         | 0.11                | 0.40 (0.23,0.57)    | 5.7E-06  |
| NC_000012.11:g.117002658G>A | rs2089222    | A                         | 0.04                | 0.56 (0.32,0.79)    | 3.7E-06  |
| NC_000017.10:g.78461406A>G  | rs9904981    | G                         | 0.77                | 0.25 (0.14,0.36)    | 6.0E-06  |
| NC_000022.10:g.22726968C>T  | rs10483112   | T                         | 0.03                | 0.59 (0.34,0.84)    | 5.2E-06  |
| NC_000002.11:g.75683350C>T  | rs12994030   | T                         | 0.27                | 0.24 (0.14,0.34)    | 3.5E-06  |
| NC_000002.11:g.76969378C>T  | rs2056208    | T                         | 0.24                | 0.24 (0.14,0.35)    | 9.1E-06  |
| NC_000004.11:g.14808039T>C  | rs10019739   | C                         | 0.27                | 0.24 (0.13,0.34)    | 8.2E-06  |
| NC_000006.11:g.115184297A>G | rs7743827    | G                         | 0.80                | 0.27 (0.15,0.38)    | 4.9E-06  |

**Supplementary Table 5: Results of Mendelian Randomization analysis testing the causal effect of microbiome pathway PWY-5022 on obesity and glycemic traits**

The table lists the results from the inverse-variance weighted (IVW) Mendelian Randomization analysis testing the causal effect of microbiome pathway PW-5022 on all traits listed in **Supplementary Table 1**. The column #SNPs indicates the number of genetic predictors that were used for the analysis of each trait (out of the 9 predictors selected for this pathway). The two-sided IVW pvalue was calculated as  $P=2 * (1- \Phi(Z))$ , where  $\Phi(Z)$  is the standard normal cumulative distribution function and Z is ratio of the combined (using inverse variance weights) causal effect and its standard error (see the Methods section). Beta represent changes in the outcome units per each standard deviation change in relative abundance of PWY-5022 – for outcome units, see **Supplementary Table 1** (for Type 2 Diabetes, changes are log (OR))

| Outcome                                                            | #SNPs | Causality by IVW    |         |
|--------------------------------------------------------------------|-------|---------------------|---------|
|                                                                    |       | Beta (95%CI)        | P       |
| Insulin secretion (IS) $AUC_{insulin} / AUC_{glucose}$             | 8     | 0.16 (0.08,0.24)    | 9.8E-05 |
| IS Insulin at 30 minutes (adj. BMI)                                | 8     | 0.12 (0.04,0.2)     | 2.4E-03 |
| IS AUC Insulin                                                     | 8     | 0.11 (0.03,0.19)    | 6.3E-03 |
| IS Correct Insulin Response (adj. insulin sensitivity index [ISI]) | 8     | 0.10 (0.02,0.18)    | 1.4E-02 |
| IS Increase at 30 minutes                                          | 8     | 0.09 (0.01,0.17)    | 1.5E-02 |
| IS Disposition Index                                               | 8     | 0.08 (0,,0.16)      | 3.4E-02 |
| Waist-hip ratio (adj. BMI)                                         | 8     | -0.02 (-0.03,0.004) | 6.4E-02 |
| 2hr Glucose (adj. BMI)                                             | 8     | -0.03 (-0.11,0.05)  | 4.1E-01 |
| IS ISI                                                             | 8     | -0.03 (-0.11,0.05)  | 4.3E-01 |
| HOMA-B                                                             | 8     | -0.003 (-0.02,0.02) | 6.2E-01 |
| Fasting glucose                                                    | 8     | 0.003 (-0.02,0.02)  | 6.3E-01 |
| HbA1c                                                              | 8     | 0.003 (-0.02,0.02)  | 6.4E-01 |
| BMI                                                                | 7     | 0.003 (-0.02,0.02)  | 7.2E-01 |
| Type 2 diabetes                                                    | 7     | 0.02 (-0.06,0.09)   | 7.4E-01 |
| Fasting proinsulin                                                 | 8     | 0.003 (-0.02,0.02)  | 8.3E-01 |
| HOMA-IR                                                            | 8     | 0.001 (-0.02,0.02)  | 9.0E-01 |
| Fasting insulin (Adj. BMI)                                         | 8     | -0.001 (-0.02,0.02) | 9.0E-01 |

**Supplementary Table 6: Results of reverse Mendelian Randomization analysis testing the causal effect of glucose-stimulated insulin response (measured by several parameters) to PWY-5022**

The table lists the results from the inverse-variance weighted (IVW) Mendelian Randomization analysis testing the causal effect of glucose-stimulated insulin response parameters on microbiome pathway PW-5022. The column #SNPs used indicates the number of genetic predictors that were used for the analysis of each trait. The (two-sided) pvalue was calculated as described in **Supplementary Table 5**. Beta represent the changes in the relative abundance of PWY-5022 (in standard deviation units) per change in the exposure units – for units, see **Supplementary Table 1** (for Type 2 Diabetes, changes are log (OR))

| Trait (exposure)                                  | #SNPs | Causality by IVW    |          |
|---------------------------------------------------|-------|---------------------|----------|
|                                                   |       | Beta (95%CI)        | <i>P</i> |
| Insulin secretion (IS) Disposition Index          | 9     | 0.20 (0.05,0.45)    | 0.13     |
| IS Correct Insulin Response (adj. ISI)            | 13    | 0.12 (0.04,0.35)    | 0.33     |
| IS Insulin 30 minutes (adj. BMI)                  | 7     | 0.28 (0.14,0.62)    | 0.11     |
| IS AUC <sub>Insulin</sub> /AUC <sub>glucose</sub> | 3     | -0.02(-0.29,0.47)   | 0.93     |
| IS AUC <sub>insulin</sub>                         | 4     | 0.26 (0.25,0.71)    | 0.26     |
| IS index                                          | 11    | -0.01(-0.0001,0.19) | 0.90     |
| IS Inc30                                          | 4     | 0.01 (0.20,0.41)    | 0.95     |

### Supplementary Table 7: Results of Mendelian Randomization analysis on the UK Biobank testing the causal effect of PWY-5022

The table lists the results of Mendelian Randomization analyses (four statistical tests: IVW, MR-PRESSO, MR-EGGER and Weighted Median) testing the causal effect of microbiome pathway PW-5022 on 7 traits using summary statistics from UK Biobank. The column N indicates the number of UK Biobank samples for which summary statistics were generated. For each Mendelian Randomization test the effect size (Beta), 95% confidence intervals and two-sided pvalues are given. Beta represents the change in the outcome units per each standard deviation change in fecal propionate levels. For Type 2 Diabetes and Obesity, beta is equivalent to log (OR). The last two columns indicate the (two-sided) pvalues for MR-PRESSO Global test and Rücker's Q' (modified) test which, if significant, indicate presence of pleiotropy.

| Outcome                    | N                   | IVW                |             | MR-PRESSO          |      | MR-Egger             |      | Weighted Median    |      | MR-PRESSO<br>Global test P | Rücker's Q'<br>(mod.) P |
|----------------------------|---------------------|--------------------|-------------|--------------------|------|----------------------|------|--------------------|------|----------------------------|-------------------------|
|                            |                     | Beta (95%C.I.)     | P           | Beta* (95%C.I.)    | P    | Beta (95%C.I.)       | P    | Beta (95%C.I.)     | P    |                            |                         |
| <i>Quantitative traits</i> |                     |                    |             |                    |      |                      |      |                    |      |                            |                         |
| BMI                        | 441355              | 0.004(-0.002,0.01) | 0.22        | 0.004(-0.004,0.01) | 0.35 | -0.007(-0.03,0.02)   | 0.64 | 0.002(-0.007,0.01) | 0.66 | 0.16                       | 0.10                    |
| BF%                        | 434823              | 0.005(-0.001,0.01) | 0.08        | 0.005(0,0.01)      | 0.10 | -0.005(-0.03,0.02)   | 0.63 | 0.004(-0.004,0.01) | 0.29 | 0.53                       | 0.47                    |
| SAT                        | 4728                | -0.005(-0.07,0.06) | 0.88        | -0.005(-0.05,0.04) | 0.83 | 0.03(-0.18,0.24)     | 0.78 | 0.004(-0.07,0.08)  | 0.93 | 0.86                       | 0.78                    |
| VAT                        | 4728                | -0.02(-0.08,0.04)  | 0.49        | -0.02(-0.1,0.06)   | 0.61 | -0.23(-0.44,-0.02)   | 0.11 | 0.04(-0.04,0.13)   | 0.33 | 0.12                       | 0.32                    |
| WHR                        | 441941              | 0.005(-0.001,0.01) | 0.08        | 0.005(-0.002,0.01) | 0.18 | -0.002(-0.02,0.02)   | 0.89 | 0.008(0.001,0.01)  | 0.02 | 0.19                       | 0.10                    |
| <i>Binary traits</i>       |                     |                    |             |                    |      |                      |      |                    |      |                            |                         |
| Obesity                    | 340039 <sup>#</sup> | 0.001(0,0.003)     | <b>0.04</b> | 0.001(0,0.003)     | 0.07 | -0.001(-0.006,0.003) | 0.57 | 0.001(0,0.003)     | 0.12 | 0.53                       | 0.51                    |
| T2D                        | 442817 <sup>§</sup> | -0.02(-0.05,0.008) | 0.14        | -0.02(-0.05,0.007) | 0.17 | -0.07(-0.18,0.04)    | 0.24 | -0.03(-0.07,0.01)  | 0.18 | 0.51                       | 0.49                    |

<sup>#</sup> Total number consists of 11708 cases and 328331 controls

<sup>§</sup> Total number consists of 19119 cases and 423698 controls

**Supplementary Table 8: Genetic predictors of fecal propionate levels and their association coefficients estimated by GWAS analysis**

The table lists the genetic predictors of fecal propionate and their association coefficients derived from a genome-wide association analysis in 898 normo-glycemic LL-DEEP individuals for which fecal propionate levels were available. For each genetic predictor, both HGVS and dbSNP identifiers are given. The (two-sided) pvalue was calculated using the linear mixed model implemented in the software EFACTS (Kang, H.M. et al. Nat Genet 42, 348-54 (2010)) as described in the **Methods** section.

| <b>HGVS</b>                | <b>dbSNP</b> | <b>Effect<br/>Allele (EA)</b> | <b>EA<br/>Frequency</b> | <b>Beta (95%CI)</b> | <b>P</b> |
|----------------------------|--------------|-------------------------------|-------------------------|---------------------|----------|
| NC_000014.8:g.79482379A>G  | rs7142308    | G                             | 0.61                    | 0.24 (0.14,0.34)    | 2.1E-06  |
| NC_000015.9:g.48088204A>C  | rs12050534   | C                             | 0.14                    | 0.31 (0.18,0.44)    | 6.4E-06  |
| NC_000003.11:g.29178581T>G | rs1400566    | G                             | 0.45                    | -0.22 (-0.31,-0.12) | 9.6E-06  |

**Supplementary Table 9: Results of Mendelian Randomization analysis testing the causal effect of fecal propionate levels to obesity and glycemic traits**

The table lists the results of the inverse-variance weighted (IVW) Mendelian Randomization analysis testing the causal effect of fecal propionate on all traits listed in **Supplementary Table 1**. The column #SNPs indicates the number of genetic predictors that were used for the analysis of each trait (out of the 3 predictors selected for this pathway). The (two-sided) pvalue was calculated as detailed in **Supplementary Table 5**. Beta represents the change in the outcome scale per each standard deviation change in fecal propionate levels.

| Trait (outcome)                                   | Scale             | #SNPs | Causality by IVW   |                       |
|---------------------------------------------------|-------------------|-------|--------------------|-----------------------|
|                                                   |                   |       | Beta (95%CI)       | P                     |
| Body Mass Index (BMI)                             | SD                | 3     | 0.03 (0.01,0.05)   | 6.8x10 <sup>-03</sup> |
| Type 2 diabetes                                   | log(OR)           | 3     | 0.14 (-0.05,0.33)  | 4.0x10 <sup>-03</sup> |
| HOMA-IR                                           | log               | 3     | -0.01 (-0.04,0.01) | 0.26                  |
| Insulin secretion (IS) AUC <sub>insulin</sub>     | original          | 3     | 0.06 (-0.07,0.19)  | 0.36                  |
| Waist-Hip ratio (adj. BMI)                        | SD                | 3     | -0.01 (-0.03,0.01) | 0.38                  |
| Fasting Insulin (adj. BMI)                        | original (pmol/L) | 3     | -0.01 (-0.02,0.01) | 0.39                  |
| HbA1c                                             | original          | 3     | 0.01 (-0.01,0.03)  | 0.55                  |
| HOMA-B                                            | log               | 3     | 0.01 (-0.01,0.03)  | 0.58                  |
| IS index (ISI)                                    | original          | 3     | -0.03 (-0.17,0.10) | 0.64                  |
| IS AUC <sub>insulin</sub> /AUC <sub>glucose</sub> | original          | 3     | 0.03 (-0.10,0.17)  | 0.66                  |
| IS Inc30                                          | original          | 3     | 0.02 (-0.10,0.15)  | 0.71                  |
| 2hr Glucose (adj. BMI)                            | original (mmol/L) | 3     | -0.01 (-0.12,0.10) | 0.88                  |
| Fasting pro-insulin                               | log               | 3     | 0.00 (-0.04,0.05)  | 0.89                  |
| IS Correct Insulin response (Adj. ISI)            | original          | 3     | -0.01 (-0.14,0.12) | 0.90                  |
| IS Disposition Index                              | original          | 3     | 0.00 (-0.12,0.12)  | 1.00                  |
| IS Insulin 30 minutes (adj. BMI)                  | original          | 3     | 0.00 (-0.13,0.13)  | 1.00                  |
| Fasting Glucose                                   | original (mmol/L) | 3     | 0.00 (-0.02,0.02)  | 0.98                  |



**Supplementary Table 10: Results of reverse Mendelian Randomization analysis testing the causal effect of BMI and T2D to fecal propionate levels**

The table lists the results of the inverse-variance weighted (IVW) Mendelian Randomization analysis testing the causal effect of BMI and T2D on fecal propionate levels. The column #SNPs indicates the number of genetic predictors that were used for the analysis of each trait. The (two-sided) pvalue was calculated as in **Supplementary Table 5**. Beta represent the standard deviation (SD) change in fecal propionate levels for each SD change in BMI or T2D risk (log(OR) scale)

| Trait (Exposure) | #SNPs | Causality IVW      |          |
|------------------|-------|--------------------|----------|
|                  |       | Beta (95%CI)       | <i>P</i> |
| Body mass index  | 96    | -0.17 (-0.56,0.22) | 0.39     |
| Type 2 diabetes  | 10    | -0.13 (-0.35,0.09) | 0.25     |

### Supplementary Table 11: Results of Mendelian Randomization analysis on the UK Biobank testing the causal effect of fecal propionate levels

The table lists the results of Mendelian Randomization analyses (four statistical tests: IVW, MR-PRESSO, MR-EGGER and Weighted-Median) testing the causal effect of fecal propionate levels on 7 traits using summary statistics from UK Biobank. The column N indicates the number of UK Biobank samples for which summary statistics were generated. For each Mendelian Randomization test the effect size (Beta), 95% confidence intervals and two-sided p-values are given. Beta represents the change in the outcome units per each standard deviation change in fecal propionate levels. For Type 2 Diabetes and Obesity, beta is equivalent to log (OR). The last two columns indicate the (two-sided) p-values for MR-PRESSO Global test and Rücker's Q' (modified) test which, if significant, indicate presence of pleiotropy.

| Outcome                    | N                   | IVW                |              | MR-PRESSO          |              | MR-Egger           |      | Weighted Median   |             | MR-PRESSO Global test P | Rücker's Q' (mod.) P |
|----------------------------|---------------------|--------------------|--------------|--------------------|--------------|--------------------|------|-------------------|-------------|-------------------------|----------------------|
|                            |                     | Beta (95%C.I.)     | P            | Beta (95%C.I.)     | P            | Beta (95%C.I.)     | P    | Beta (95%C.I.)    | P           |                         |                      |
| <i>Quantitative traits</i> |                     |                    |              |                    |              |                    |      |                   |             |                         |                      |
| BMI                        | 441355              | 0.02(0.005,0.03)   | <b>0.003</b> | 0(-0.001,0.002)    | 0.79         | -0.01(-0.08,0.06)  | 0.96 | 0(-0.01,0.02)     | 0.61        | <b>0.001</b>            | <b>1e-4</b>          |
| Body Fat%                  | 434823              | 0.02(0.007,0.03)   | <b>0.001</b> | 0.01(-0.003,0.02)  | 0.42         | -0.03(-0.10,0.04)  | 0.83 | 0.01(-0.01,0.03)  | 0.18        | <b>0.02</b>             | <b>0.02</b>          |
| SAT                        | 4728                | -0.04(-0.15,0.06)  | 0.36         | -0.05(-0.12,0.02)  | 0.30         | -0.07(-0.79,0.65)  | 0.87 | -0.03(-0.17,0.10) | 0.62        | 0.60                    | 0.35                 |
| VAT                        | 4728                | -0.13(-0.23,-0.03) | <b>0.01</b>  | -0.13(-0.16,-0.10) | 0.01         | -0.24(-0.97,0.49)  | 0.52 | -0.12(-0.25,0.01) | 0.06        | 0.91                    | 0.80                 |
| WHR                        | 441941              | 0.01(-0.002,0.02)  | 0.15         | 0.01(-0.009,0.022) | 0.49         | -0.06(-0.12,0.002) | 0.37 | 0(-0.01,0.01)     | 0.82        | 0.09                    | 0.52                 |
| <i>Binary traits</i>       |                     |                    |              |                    |              |                    |      |                   |             |                         |                      |
| Obesity                    | 340039 <sup>#</sup> | 0(-0.002,0.002)    | 0.98         | 0(-0.002,0.002)    | 0.98         | -0.01(-0.02,0.007) | 0.25 | 0(-0.002,0.003)   | 0.75        | 0.51                    | 0.92                 |
| T2D                        | 442817 <sup>§</sup> | 0.07(0.02,0.12)    | <b>0.01</b>  | 0.07(0.06,0.08)    | <b>0.007</b> | 0.01(-0.36,0.38)   | 0.95 | 0.07(0.004,0.13)  | <b>0.04</b> | 0.97                    | 0.99                 |

<sup>#</sup> Total number consists of 11708 cases and 328331 controls

<sup>§</sup> Total number consists of 19119 cases and 423698 controls
